# Supplementary material
Source: PubMed Central journal article supplement (PMC4610874)
Supplement: NIHMS718105-supplement-1.pdf [file NIHMS718105-supplement-1.pdf]

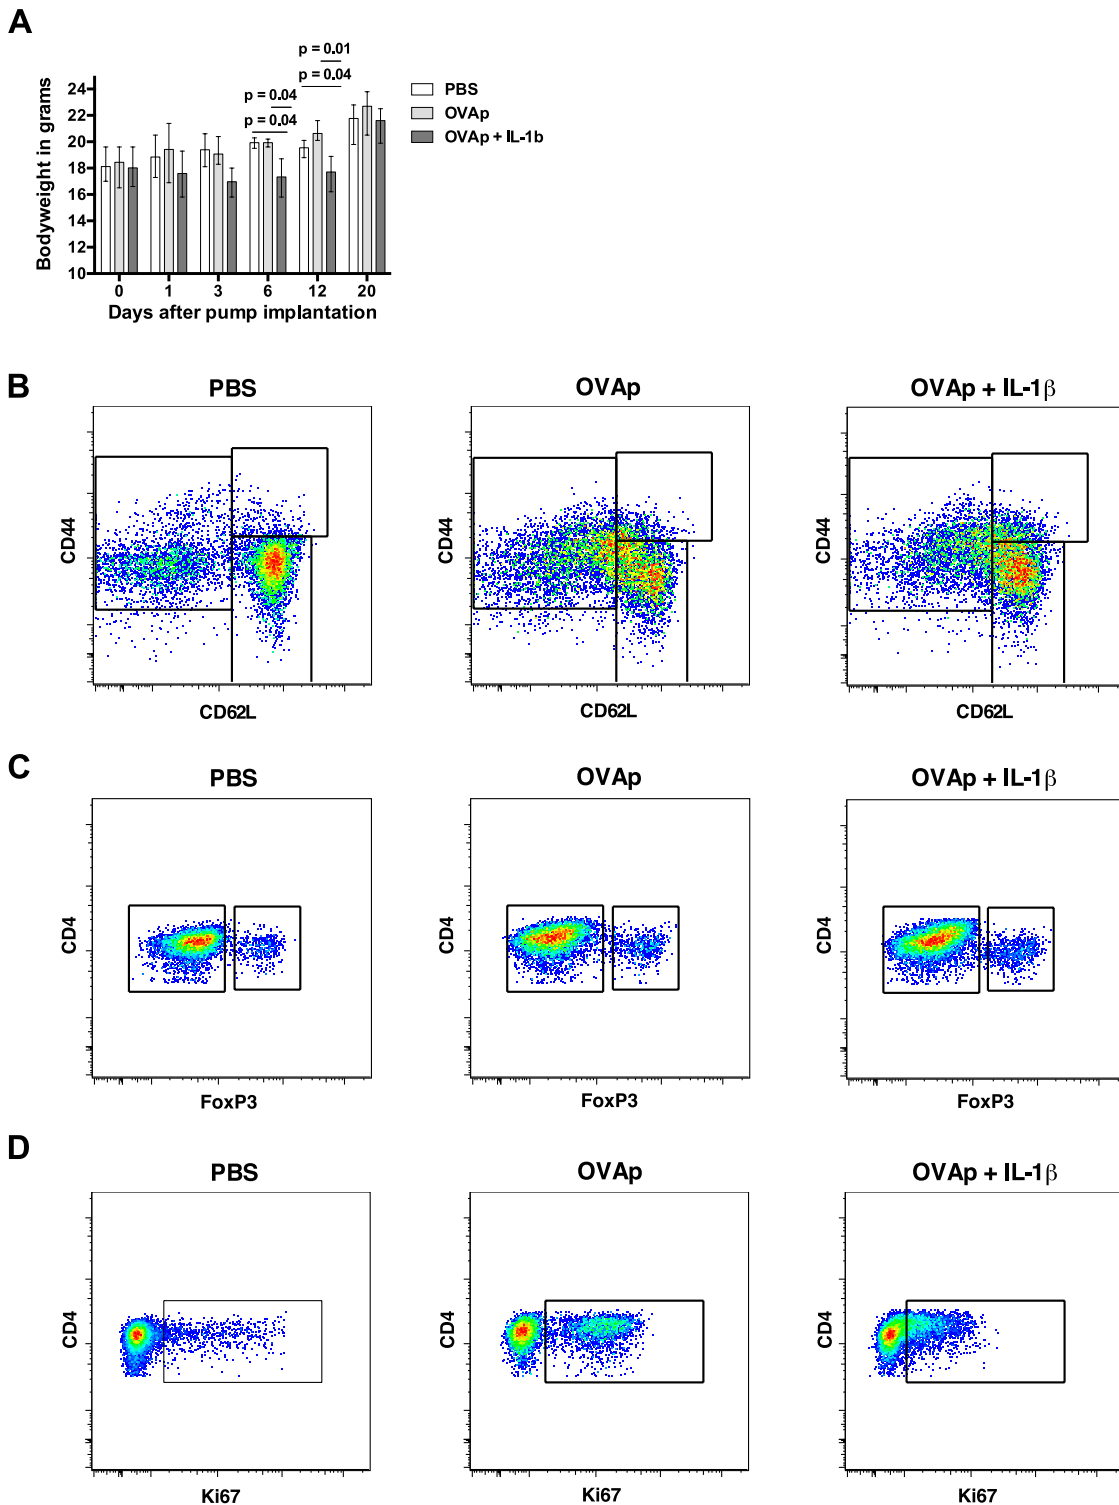

**Supplemental Figure 1.** (A) Weights of the mice over time (means and ranges). (B) Flow cytometric data showing CD4<sup>+</sup> T cell expression of CD44 and CD62L in representative mice from each group. (C) Flow cytometric data showing CD4<sup>+</sup> T cell expression of FoxP3 in representative mice from each group. (D) Flow cytometric data showing CD4<sup>+</sup> T cell expression of Ki67 in representative mice from each group. \*, p<0.05 PBS versus OVAp; grey asterisk, p<0.05 PBS versus OVAp + IL-1 $\beta$ ; \*\*#, p<0.05 OVAp versus OVAp + IL-1 $\beta$ . Statistical analysis was conducted using a two-way ANOVA with the Tukey post-test to correct for multiple comparisons.

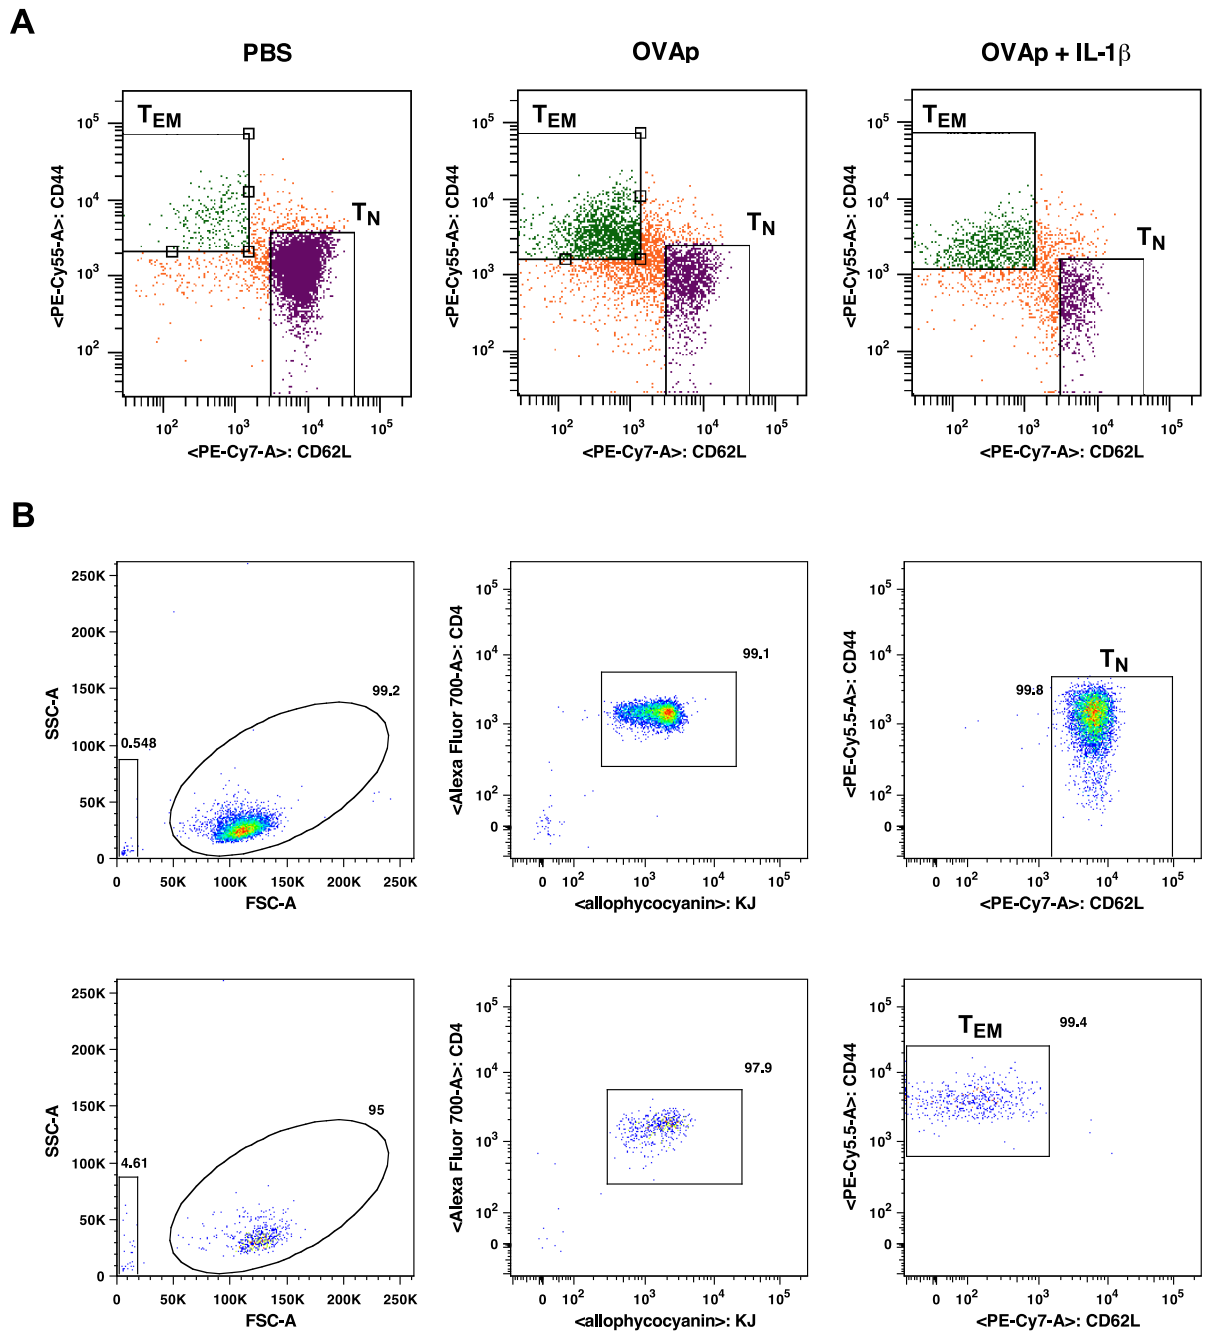

**Supplemental Figure 2.** Representative sort gates and purity checks. These data correspond to those shown in Figure 6 and Suppl. Fig. 4. **(A)** Sort gates for CD4<sup>+</sup> T<sub>N</sub> and T<sub>EM</sub> cells as indicated in representative mice from each group. **(B)** Purity checks for CD4<sup>+</sup> T<sub>N</sub> (top) and T<sub>EM</sub> (bottom) cells sorted at two different time points. The slim rectangular gate in the left panel shows different system noise levels.

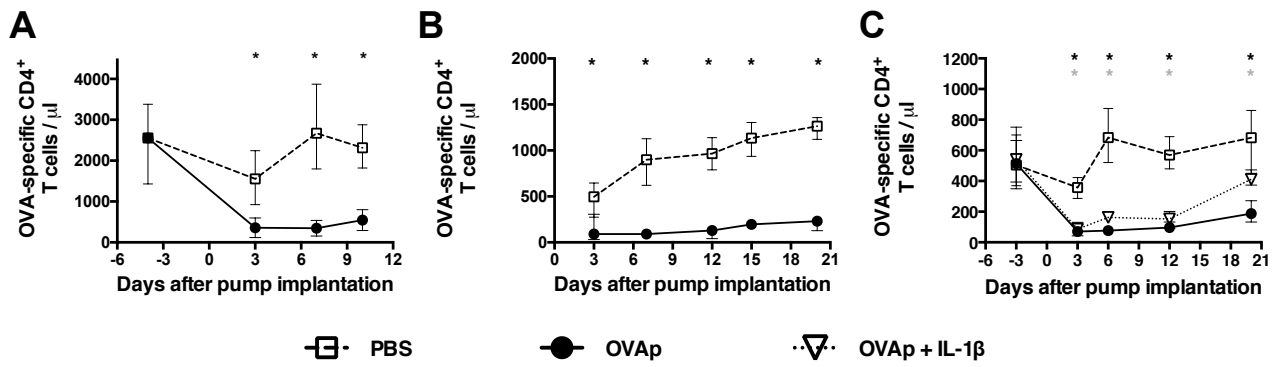

**Supplemental Figure 3.** Peripheral blood OVA-specific CD4<sup>+</sup> T cell numbers per microliter of blood are shown side-by-side from three independent experiments. Shown are means and ranges. \*, p<0.05 PBS versus OVAp; grey asterix, p<0.05 PBS versus OVAp + IL-1 $\beta$ ; \*#, p<0.05 OVAp versus OVAp + IL-1 $\beta$ . In **(A)** and **(B)**, statistical analysis was conducted using the Mann-Whitney U test. In **(C)**, statistical analysis was conducted using a two-way ANOVA with the Tukey post-test to correct for multiple comparisons. These latter data are also shown in Fig. 1A.

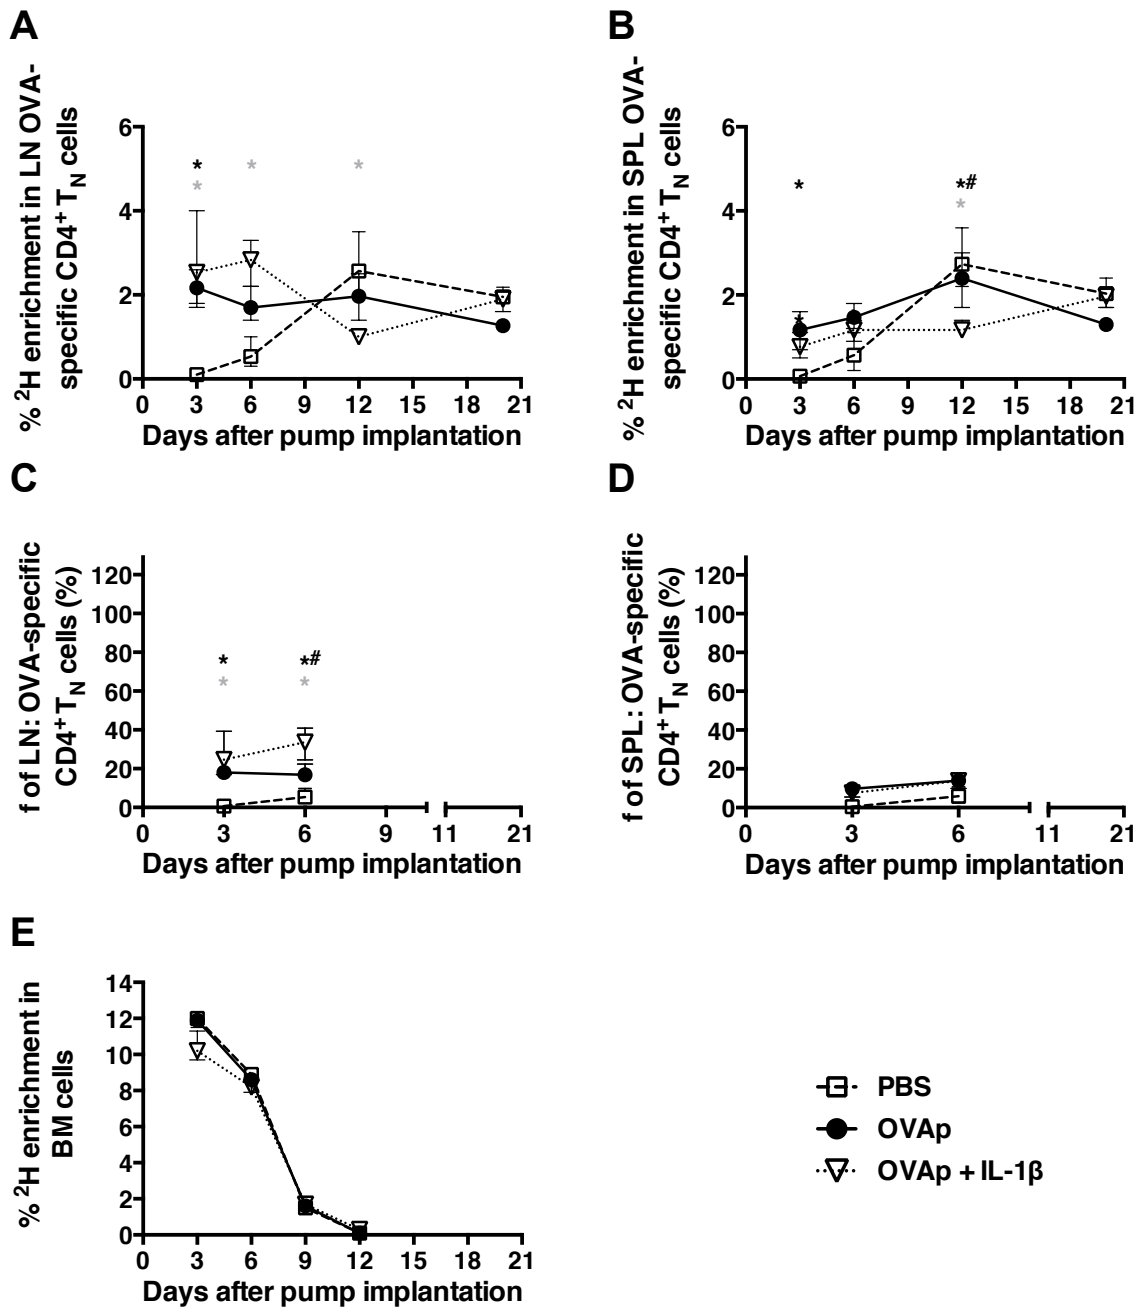

**Supplemental Figure 4.** *In vivo* labeling data for OVA-specific CD4<sup>+</sup> T<sub>N</sub> cells. These data correspond to those shown in Figure 6. **(A)** <sup>2</sup>H enrichments of OVA-specific CD4<sup>+</sup> T<sub>N</sub> cells sorted from peripheral LNs. **(B)** <sup>2</sup>H enrichments of OVA-specific CD4<sup>+</sup> T<sub>N</sub> cells sorted from the spleen. **(C)** Fractions of labeled OVA-specific CD4<sup>+</sup> T<sub>N</sub> cells sorted from peripheral LNs. **(D)** Fractions of labeled OVA-specific CD4<sup>+</sup> T<sub>N</sub> cells sorted from the spleen. **(E)** <sup>2</sup>H enrichments of bone marrow cells. Shown are means and ranges. \*, p<0.05 PBS versus OVAp; grey asterisk, p<0.05 PBS versus OVAp + IL-1β; \*\*, p<0.05 OVAp versus OVAp + IL-1β. Statistical analysis was conducted using a two-way ANOVA with the Tukey post-test to correct for multiple comparisons.
